# Supplementary material
Source: HighWire-hosted journal article supplement (https://www.cmajopen.ca/highwire/filestream/88579/field_highwire_adjunct_files/1/open-2021-0307-original-submission.pdf)
Supplement: open-2021-0307-original-submission.pdf [file open-2021-0307-original-submission.pdf]

## Physician Home Visits in Ontario: Trends over Time and Patient Characteristics

Lauren Lapointe-Shaw MD PhD,<sup>1,2,3,4,5</sup> Tara Kiran MD MSc,<sup>4,5,6,7</sup> Andrew P. Costa PhD,<sup>4,8,9</sup> Yingbo Na MSc,<sup>4</sup> Samir K. Sinha MD DPhil,<sup>1,2,5,6</sup> Katherine E. Nelson MD PhD,<sup>4,10</sup> Nathan M. Stall MD,<sup>1,2,5</sup> Noah M. Ivers MD PhD,<sup>3,4,5, 6, 11</sup> Aaron Jones PhD.<sup>4,8</sup>

1. Division of General Internal Medicine and Geriatrics, University Health Network and Sinai Health System, Toronto, Ontario
2. Department of Medicine, University of Toronto, Toronto, Canada
3. Women's College Institute for Health System Solutions and Virtual Care, Women's College Hospital, Toronto, Canada
4. ICES, Ontario, Canada
5. Institute of Health Policy, Management and Evaluation, University of Toronto
6. Department of Family and Community Medicine, University of Toronto
7. Department of Family and Community Medicine and MAP Centre for Urban Health Solutions, St Michael's Hospital, Toronto, Canada
8. Department of Health Research Methods, Evidence, and Impact, McMaster University, Hamilton, Ontario, Canada
9. Centre for Integrated Care, St. Joseph's Health System, Hamilton, Ontario
10. Department of Paediatrics, Hospital for Sick Children, Toronto, Ontario, Canada.
11. Department of Family Medicine, Women's College Hospital

**Corresponding author:** Lauren Lapointe-Shaw, lauren.lapointe.shaw@utoronto.ca

**Funding Statement:** This study was supported by the Toronto General Hospital Research Institute and by ICES, which is funded by an annual grant from the Ontario Ministry of Health and Long-Term Care (MOHLTC).

**Declaration of Competing Interests:** none

**ABSTRACT**

Background: Physician home visits ensure that access to primary and palliative care is not limited to those who can visit an office setting. It is unknown how home visits have changed over time, and in response to payment incentives. We measured the use of physician home visits in Ontario from 2005 to 2018, and described the characteristics of patients who received them.

Methods: We conducted a retrospective study using health administrative data in Ontario, Canada. We first examined annual population-level home visit volumes and costs from 2005-2018, categorized as palliative, homecare services recipient, or other. We then compared the sociodemographic and healthcare utilization characteristics of home visit recipients between groups.

Results: More than half (51.6%) of physician home visits from 2005-2018 were provided to patients who were neither palliative nor receiving homecare services. This group of patients was younger, had fewer comorbidities and lower rates of healthcare utilization before and after the visit than those in the palliative or homecare services groups. Only 28% of these visits were with the patient's enrolling primary care physician or a physician in the same group, and only 39% were with a physician they had seen in the previous year.

Interpretation: A large proportion of physician home visits in Ontario are provided to patients who are young, have few-to-no comorbidities, and low health services utilization before and after the home visit. This suggests an opportunity to refine policy tools to precisely target patients who are most likely to benefit from home visits.

## INTRODUCTION

Homebound individuals face challenges accessing preventive, chronic, and acute care, leading to adverse health effects and an over-reliance on emergency and hospital-based services.<sup>1,2</sup>

Home-based primary care<sup>3</sup> can reduce the use of emergency department visits and hospitalizations for homebound older adults,<sup>4-7</sup> provide essential information about patients' needs and home life<sup>8</sup>, and is perceived positively by patients, caregivers and providers.<sup>9-11</sup> For many homebound older adults, strengthening primary care at home has the twin benefits of shifting care out of hospitals and also delaying the need for residential long-term care.<sup>12</sup>

Similarly, patients near the end of life have complex health needs yet often prefer to spend their last days at home with loved ones rather than in a residential hospice setting.<sup>13</sup> Physician home visits may also increase the likelihood of death occurring at home.<sup>14,15</sup>

Access to physician home visits is essential to meet the needs of palliative and other homebound patients. While rates are still declining in some regions, financial incentives have driven a resurgence in physician home visits in the United States.<sup>16-18</sup> Yet, fee-for-service or other volume-based incentives may also reward providers and companies that aim to maximise profits by offering short, low-complexity visits of convenience, disconnected from patients' existing health care team. It is unknown how much of current physician home visit volume is driven by low-complexity or low-continuity visits. We measured the use of physician home visits in Ontario from 2005 to 2018, and describe the sociodemographic and healthcare usage profiles of patients who received them. We hypothesized that many recipients of physician home visits were neither palliative nor receiving homecare services, and aimed to explore this group's characteristics.

## METHODS

### Setting

Ontario is Canada's most populous province, with over 14.5 million residents, accounting for over 38% of Canada's total population. Public health insurance is provided without premium or co-pay through the Ontario Health Insurance Program (OHIP). Overall 93% of Ontario residents report having a primary care provider with 82% formally enrolled to a physician working in a Patient Enrolment Model<sup>19</sup> –a model where physicians work in groups, have shared responsibility for after-hours care, and receive some blended payments and incentives. Primary care physicians not practicing in a patient enrolment model work independently and are paid fee-for-service.<sup>20</sup>

To incentivize the provision of physician home visits, the Ontario Ministry of Health has long offered special visit premiums for visits in a home setting. However, in 2005, a special visit premium was introduced for palliative home visits with a dollar value three times that of the corresponding code for a regular home visit.<sup>21</sup> In 2012, additional annual bonus payments were introduced, paying physicians who provide the highest volume of non-palliative, primary care home visits up to an additional \$8,000 annually.<sup>22</sup>

### Study Design and Data Sources

This retrospective study used health administrative datasets linked using unique encoded identifiers and analyzed at ICES in Ontario, Canada. We included a descriptive analysis of changes in physician home visits over time and a patient-level analysis to understand characteristics of those receiving home care.

ICES holds information on physician and emergency department visits, hospital stays, and publicly-funded home healthcare in Ontario (see Appendix 1 for details). Because of the universal nature of healthcare coverage under OHIP, this study was population-based. It was also exempt from Ethics review under section 45 of Ontario's Personal Health Information Protection Act.

### Study Population

For our population-level analysis of physician home visits over time, we included all Ontario residents with a valid health card with at least one physician home visit between April 1<sup>st</sup> 2005 to March 31<sup>st</sup>, 2019. A physician home visit was defined using a combination of dedicated home visit billing codes and other assessment codes with a location of "home" (see Appendix 2 for detailed definition).

For our patient-level analysis, we further narrowed the inclusion period to April 1<sup>st</sup> 2014 - March 1<sup>st</sup>, 2019. We selected the first physician home visit per patient and excluded all others (Flowchart in Appendix Figure 1).

## Measures

### *Stratification of physician home visits*

We categorized physician home visits by the type of recipient (palliative, homecare services, other). We used billing codes to determine if the visit was palliative (Appendix Table 2). We categorized recipients as receiving homecare services if they had received two or more services in the previous 30 days. Homecare services involve personal support workers, nurses, or other allied health professionals, but not physicians. We used homecare services as a proxy for a level of functional impairment that would impede attendance at medical appointments outside a home setting.

### *Trends over time*

We measured the annual total value of physician home visit billings, which was the sum of all billing claims resulting from an encounter with at least one home visit code. We used Statistics Canada's Ontario population estimates to calculate the annual rate of physician home visits per 10,000 people.<sup>23</sup>

### *Patient characteristics and health system use*

Patient-level baseline characteristics included demographics: age, sex, urban/rural residence<sup>24</sup>, census-based neighborhood income quintile, immigrant status<sup>25</sup>, and limited proficiency in English or French (available for all immigrants landing in Ontario after 1985). We also included count of comorbidities over the previous 2 years using Johns Hopkins Aggregated Diagnosis Groups<sup>26</sup> (ADG), healthcare utilization over the previous 2 years grouped into low (0-2), moderate (3), and high (4-5) Resource Utilization Bands<sup>26</sup> (RUB), emergency department visits in the previous 30 days, hospital discharge in the previous 30 days, count of outpatient physician visits in the previous year, homecare services in the previous 30 days, emergency department visit or hospitalization for a mental health condition in the previous two years<sup>27</sup>, history of dementia<sup>28</sup>, asthma<sup>29,30</sup>, diabetes<sup>31</sup>, chronic obstructive pulmonary disease<sup>32</sup>, heart failure<sup>33</sup>, or post-partum status.<sup>34</sup> We also included information on primary care attachment (see Appendix Table 3 for operational definition of all variables).

The Resident Assessment Instrument – Homecare (RAI-HC) is a validated tool covering social, functional and health dimensions.<sup>35-37</sup> This tool is used for the approximately 40% of Ontario homecare service recipients who are "long-stay" or expected to have care needs beyond 60 days and is typically completed every 6 months.<sup>38-40</sup> For the subgroup of patients who had a RAI-HC assessment completed within 6 months before the index home visit, we reported whether the recipient had hearing impairment, vision impairment, a caregiver in the home, use of an assistive device, dependency for locomotion, as well as their homebound status.

We included the following variables relating to relational continuity between patient and physician: whether the patient was formally enrolled to the home visiting physician, whether

1  
2  
3 the patient was enrolled to a physician in the same group as the home visiting physician, and  
4 whether the patient was known to the home visiting physician from another encounter in the  
5 previous year. In addition, we reported patient events following the index physician home visit:  
6 repeat home visits in the subsequent year and office physician visit, emergency department  
7 visit or urgent hospitalization within 30 days.  
8  
9

### 10 11 12 13 **Data Analyses**

14  
15 First, we plotted the annual count of home visits per 10,000 Ontarians and the annual total cost  
16 of physician home visit billings over time, stratified by type of recipient (palliative, homecare  
17 service recipient, or other).  
18

19  
20 In our patient-level analysis, we described baseline, patient-physician dyad, and post-home visit  
21 characteristics using counts and frequencies, as well as medians (IQR). We compared  
22 characteristics across the three groups using chi-square and Kruskal-Wallis tests, at a  $p < 0.05$   
23 significance threshold. All analyses were executed in SAS software, version 9.4 (SAS Institute  
24 Inc., Cary, NC).  
25  
26  
27  
28  
29

### 30 31 32 **Subgroup Analyses**

33  
34 We examined the subgroup of patients under age 18 at the time of their index home visit. For  
35 this group, we determined whether or not each patient had a history of a pediatric complex  
36 chronic medical condition, according to a definition used by the Canadian Institute for Health  
37 Information (CIHI).<sup>41</sup>  
38  
39  
40  
41  
42  
43  
44  
45  
46  
47  
48  
49  
50  
51  
52  
53  
54  
55  
56  
57  
58  
59  
60

## RESULTS

### Physician Home Visits over Time

The annual number of home visits per 10,000 people declined slightly in 2005-2007, remained stable from 2007-2012, and then increased from 2012-2018 to a maximum of 306 per 10,000 people in 2018 (Figure 1)— a 137% increase relative to 2005. Despite only accounting for 19.5% (N=859,978) of all physician home visits, palliative home visits per 10,000 people increased 11-fold and accounted for 90.5% of the growth in home visit volume from 2005 to 2018.

Homecare service recipients received 28.9% of physician home visits (N=1,278,391), and 51.6% (N=2,279,965) who were neither palliative nor homecare service recipients were classified as "other". Although the "other" group accounted for a 22.9% increase in physician home visit costs from 2005 to 2018, the relative stability of visits per 10,000 people over time suggests that much of this may have been accounted for by population growth.

The total annual cost of physician home visits reached a peak of \$56.3 million in 2018 (Figure 2)—40.2% of this was the cost of palliative home visits (\$22.6 million), 20.4% of this was the cost of visits to homecare service recipients (\$11.5 million) and 39.4% (\$22.2 million) was the cost of home visits to "other" recipients.

### Characteristics of Patients Receiving Home Visits

From 2014 to 2018, 413,057 patients received at least one physician home visit - 17.4% received two, and 31.8% received more than two over the following year. Among physician home visit recipients, 13.1% (n=53,997) were children, 28.6% (n=118,127) were adults under age 65, and 58.3% (n=240,933) were older adults (Table 1).

Recipients of physician home visits were more likely to be female (57.6%), and they mostly (78.3%) resided in large urban settings. More than half were high healthcare users (57.9%), and 20.4% and 15.4% had an emergency department visit and hospital discharge in the previous 30 days. Yet, most (63.3%) had not received any homecare services in the previous month. The majority (74.5%) were formally enrolled to a primary care physician; however, the home visiting physician was their own physician in only 28.9% of visits; another physician in the same group provided 3.5% of visits. The physician was previously known to the patient in just under half of physician home visits (45.8%).

### Comparison between Physician Home Visit Types

Of all patients who received a first physician home visit, 17.2% (N=70,947) had a palliative visit, 20.7% (N=85,343) received homecare services and the remaining 62.2% (N=256,767) were classified as "other."

Compared to the palliative and homecare service recipients, other patients who received physician home visits were younger (36.5% under age 40, compared to 1.3% and 1.6%,  $p < 0.001$ , Table 1) and had fewer comorbidities (Lowest comorbidity group 37.5% compared to 7.9% and

1  
2  
3 12.6%,  $p < 0.0001$ ). This group also had the lowest rates of healthcare utilization over the  
4 previous 2 years (lowest utilization band 13.5% compared to 0.6% and 1.7%), including fewer  
5 outpatient visits in the previous year (median 8 compared to 31 and 16,  $p < 0.001$ ), and fewer  
6 patients with an emergency department visits (11.6% compared to 43.5% and 27.8%) or  
7 hospital discharge in the previous 30 days (6.2% compared to 39.1% and 23.5%).  
8  
9

10  
11  
12  
13 Patients in the "other" group were more likely to live in a large urban area (83.7% compared to  
14 65% and 73.0%,  $p < 0.001$ ), to be immigrants (11.7% vs 7.0% palliative and 7.2% homecare,  
15  $p < 0.001$ ) and to have limited proficiency in English and French (4.5% vs 3.2% palliative, 3.5%  
16 homecare,  $p < 0.001$ ). Homecare service recipients and the "other" group were more likely to  
17 live in low-income neighborhoods (lowest quintile 25.1% and 24.2% compared to 21.2%,  $p <$   
18 0.001), however the "other" group and the palliative group included more patients from high-  
19 income neighborhoods (20.8% and 19.4% compared to 15.9%,  $p < 0.001$ ).  
20  
21  
22  
23  
24  
25

26 Homecare service recipients were most likely to receive a physician home visit from their own  
27 primary care physician or a physician in the same group (48.7% vs 28.6% palliative, 28.0%  
28 "other",  $p < 0.001$ ). Patients in the "other" group were least likely to have a home visit with a  
29 physician who was previously known to them (39.0% compared to 51.7% and 61.4%,  $p < 0.001$ ).  
30  
31  
32  
33

34 Palliative and homecare service recipients were more likely to receive subsequent physician  
35 home visits than those in the "other" group, who often (60.8%) had no subsequent visits  
36 ( $p < 0.001$ ). Patients in the "other" group had the lowest 30-day rate of visit to the emergency  
37 department (13.0 compared to 20.3 and 23.9,  $p < 0.0001$ ) and urgent hospitalization (4.5%  
38 compared to 14.7% and 13.8%,  $p < 0.001$ ).  
39  
40  
41  
42  
43

44 The most common diagnoses in the "other" group were acute nasopharyngitis (14.2%), acute  
45 bronchitis (4.6%), anxiety and related conditions (4.3%), dementia (4.1%) and hypertension  
46 (2.9%); the rest of the top 10 conditions are listed in Appendix Table 4).  
47  
48  
49

#### 50 **Subgroup: Long-Stay Homecare (RAI-HC) Assessment**

51  
52  
53 In our patient cohort, 19.9% (N=82,375) of all physician home visit recipients had a long-stay  
54 homecare assessment (RAI-HC) completed in the previous 6 months—this was 27.0% of the  
55 palliative group, 61.3% of the homecare services group, and just 4.3% of the "other" group.  
56  
57 Among these, homecare service recipients were most likely to have impairments in vision and  
58 hearing, use of an assistive device, and be dependent on others for locomotion. They were also  
59 most likely to be homebound or borderline homebound. About a third of "other" patients who  
60 had a RAI-HC assessment were homebound (31.5%), however this represented only 1.3% of all  
patients in the "other" group (compared to 9.4% of palliative group, 25.2% of homecare group).

#### **Subgroup: Pediatric Patients**

There were 53,997 patients under age 18, representing 13.1% of the cohort- this was 0.8% of  
the palliative group, 0.4% of the homecare services group, and 20.7% of the "other" group.



1  
2  
3 Nearly all (98.3%) pediatric home visits were neither palliative nor delivered to homecare  
4 recipients, and classified as "other."  
5  
6

7 Those in the "other" group were considerably less likely to have a pediatric chronic medical  
8 condition (3.9% compared to 76.2% and 70.0%,  $p<0.001$ , Table 3), had lower rates of previous  
9 healthcare utilization (lowest utilization band 30.5% compared to 8.4% and 5.8%,  $P<0.001$ ),  
10 including fewer emergency department visits (5.7% compared to 20.3% and 15.8%),  
11 hospitalizations (2.6% compared to 35.7% and 16.7%) and outpatient visits (median 5  
12 compared to 31 and 14,  $p<0.001$ ).  
13  
14  
15  
16  
17  
18

19 Patients in the other group were least likely to have a home visit with a physician who was  
20 previously known to them (15.0% compared to 49.9% and 31.5%,  $p<0.001$ ). They were also  
21 least likely to have an emergency department visit (9.1% compared to 16.6% and 17.3%,  
22  $p<0.001$ ) or hospitalization within 30 days following the physician home visit (0.9% compared to  
23 10.2% and 10.0%,  $p<0.001$ ).  
24  
25  
26  
27  
28

29 The most common diagnoses for this group were acute nasopharyngitis (32.6%), other viral  
30 diseases (6.0%), serous otitis media (5.2%), gastroenteritis (4.7%), and acute bronchitis (3.5%,  
31 Appendix Table 5).  
32  
33  
34  
35  
36  
37  
38  
39  
40  
41  
42  
43  
44  
45  
46  
47  
48  
49  
50  
51  
52  
53  
54  
55  
56  
57  
58  
59  
60

## DISCUSSION

After a plateau from 2007 to 2012, the annual rate of physician home visits in Ontario increased to 306 per 10,000 people in 2018. Overall, 62% of patients who received their first physician home visit were neither palliative nor homecare service recipients. This group of patients was younger, with fewer comorbidities and lower rates of prior healthcare utilization than those receiving palliative home visits or homecare services. This group was also least likely to have repeat physician home visits, subsequent emergency department visits and hospitalizations. These findings suggest that physician home visit recipients who are neither palliative nor on a homecare services roster are an overall younger, healthier population that may access physician home visits for reasons other than a physical inability to leave the home.

In our study, patients in the "other" group were least likely to have previous encounters with the home visiting physician. Similar to walk-in clinic encounters<sup>42</sup> and U.S. home visits requested using a smartphone application<sup>43</sup>, we found the most common diagnoses in the "other" group were acute viral illnesses. On-demand physician home visits come at the cost of relational and informational discontinuity with the usual primary care provider. Whether because of a lack of attachment to a primary care provider, insufficient after-hours access to their usual provider, or a desire for convenience, this trade-off may be acceptable to many patients.<sup>43</sup> In addition, the overrepresentation of both the lowest and highest income quintiles, and a greater proportion of immigrants in the "other" group could indicate that broad availability of physician home visits contributes to equity of access for groups with inflexible work hours or caregiving responsibilities. It is not known how such visits contribute to other dimensions of quality healthcare, such as efficiency and effectiveness.<sup>44</sup>

Since 2005 when palliative special visit premiums were introduced to Ontario,<sup>21</sup> the volume of palliative home visits has increased steadily, and these accounted for most of the growth in total home visit volume and costs from 2005-2018. This is good news, as many palliative patients have a high symptom burden, limited mobility outside the home, and high healthcare needs. The annual volume of physician home visits also had a notable inflection point in 2012, when volume bonuses for primary care home visits were substantially increased.<sup>22</sup> After 2012, both homecare service recipients and "other" home visits began a steady rise in annual volume. In contrast, physician home visits were recently declining in British Columbia, Canada<sup>45</sup> and Switzerland.<sup>46</sup> Notably, many European countries have much higher rates of home visit provision than in North America - whereas over 60% of primary care physicians surveyed in the UK, Netherlands and Switzerland reported commonly providing home visits, this was only 19% in Canada, and 6% in the U.S.<sup>47</sup> The U.S., like Ontario, has benefitted from financial incentives to support physician home visits. Home visits in the U.S. have risen dramatically over the past 20 years, as a result of increased fee-for-service payments through Medicare, special funding through demonstration projects, and healthcare reform prioritising high-value care.<sup>16</sup> Notably,

1  
2  
3 hospitals and accountable care organizations have found home visits to be cost-saving, as a  
4 result of avoided readmissions, and fewer hospital and nursing home bed-days.<sup>8,11,16</sup>  
5  
6

7  
8 Until 2019, Ontario's particular incentive structure did little to ensure that physician home visits  
9 were reserved for those who would otherwise have high healthcare use. In 2019, the physician  
10 fee schedule was changed to limit home visit premiums to "frail elderly or housebound"  
11 patients.<sup>48</sup> This change should reduce the number of "other" home visits, however the  
12 interpretation of any subsequent changes in home visit volumes will be confounded by the  
13 onset of the COVID-19 pandemic -- in spring 2020, physician home visits had dropped by 60%  
14 compared to the previous year.<sup>49</sup> It will be essential to examine how and whether physician  
15 home visits rebound, to evaluate the effect of the 2019 fee schedule change and to ensure that  
16 the needs of Ontario's growing homebound population are met.  
17  
18  
19  
20  
21  
22  
23

24  
25 Our study has several limitations. First, we could not capture home visits provided by salaried  
26 nurse practitioners who often work in team-based primary care models. As a result, our  
27 numbers for total physician home visits underestimate the total number of home visits by all  
28 primary care providers in Ontario. Second, we used receipt of homecare services as a proxy for  
29 functional dependency or homebound status, however we could not identify receipt of private  
30 homecare services, or support by unpaid caregivers. As a result, the "other" patient category  
31 will contain a small number of functionally dependent individuals. Third, in this study using  
32 health administrative data we could not ascertain why patients sought a home- rather than  
33 office-based visit. Finally, although our findings are rooted in an Ontario context, they are likely  
34 generalizable to settings with similar physician payment structures- that is, physician  
35 remuneration through fee-for-service and capitation-based models.  
36  
37  
38  
39  
40  
41  
42  
43  
44

## 45 **Conclusion**

46  
47  
48 In this study of the population of Ontario, Canada, we found that physician home visits  
49 increased 137% from 2005-2018—most of this growth was explained by an 11-fold increase in  
50 palliative home visits. Yet, 52% of all physician home visits during this time were provided to  
51 patients who were neither palliative nor receiving homecare services. This group was younger,  
52 healthier, and had fewer previous and subsequent healthcare encounters than their  
53 comparators. Such home visits may facilitate access at the expense of continuity of care. Our  
54 findings will inform payment models and regulatory frameworks to support the provision of  
55 high-quality physician home visits to those who are most likely to benefit. Further research is  
56 needed on the efficiency and effectiveness of low-complexity home visits, and to monitor the  
57 recovery of necessary physician home visits in the wake of the COVID-19 pandemic.  
58  
59  
60

## Acknowledgments

Lauren Lapointe-Shaw is supported by the University of Toronto Department of Medicine, the Toronto General Hospital Research Institute, the Women's College Institute for Health System Solutions and Virtual Care (WIHV) and the Peter Gilgan Centre for Women's Cancers at Women's College Hospital, in partnership with the Canadian Cancer Society. Tara Kiran is the Fidani Chair of Improvement and Innovation at the University of Toronto. She is supported as a Clinician Scientist by the Department of Family and Community Medicine at St. Michael's Hospital and the University of Toronto. Noah M. Ivers is supported by a Canada Research Chair in Implementation of Evidence-based Practice and a Clinician Scholar award from the Department of Family and Community Medicine at Women's College Hospital and the University of Toronto. Nathan M. Stall is supported by the Department of Medicine's Eliot Phillipson Clinician-Scientist Training Program and the Clinician Investigator Program at the University of Toronto and the Vanier Canada Graduate Scholarship.

This study was based on data compiled by ICES. However, the analyses, conclusions, opinions and statements expressed herein are those of the author(s), and not necessarily those of ICES. Parts of this material are based on data and information compiled and provided by: MOHLTC, Ontario Association of Community Care Access Centres (OACCAC), Immigration, Refugees and Citizenship Canada (IRCC) and Canadian Institute for Health Information (CIHI). The analyses, conclusions, opinions and statements expressed herein are solely those of the authors and do not reflect those of the funding or data sources; no endorsement is intended or should be inferred.

## REFERENCES

1. Musich S, Wang SS, Hawkins K, Yeh CS. Homebound older adults: Prevalence, characteristics, health care utilization and quality of care. *Geriatric Nursing*. 2015;36(6):445-450.
2. Ornstein KA, Leff B, Covinsky K, et al. The Epidemiology of the Homebound in the United States. *JAMA internal medicine*. 2015;175(7):1180-1186.
3. Stall N, Nowaczynski M, Sinha SK. Back to the future: home-based primary care for older homebound Canadians: part 2: where we are going. *Canadian Family Physician*. 2013;59(3):243-245.
4. Stall N, Nowaczynski M, Sinha SK. Systematic review of outcomes from home-based primary care programs for homebound older adults. *Journal of the American Geriatrics Society*. 2014;62(12):2243-2251.
5. McGregor MJ, Cox MB, Slater JM, et al. A before-after study of hospital use in two frail populations receiving different home-based services over the same time in Vancouver, Canada. *BMC health services research*. 2018;18(1):248.
6. Rosenberg T. Acute hospital use, nursing home placement, and mortality in a frail community-dwelling cohort managed with Primary Integrated Interdisciplinary Elder Care at Home. *J Am Geriatr Soc*. 2012;60(7):1340-1346.
7. Jones A, Bronskill SE, Seow H, et al. Physician Home Visit Patterns and Hospital Use Among Older Adults with Functional Impairments. *J Am Geriatr Soc*. 2020;68(9):2074-2081.
8. Frazee TK, Beidler LB, Briggs ADM, Colla CH. 'Eyes In The Home': ACOs Use Home Visits To Improve Care Management, Identify Needs, And Reduce Hospital Use. *Health Affairs*. 2019;38(6):1021-1027.
9. Shafir A, Garrigues SK, Schenker Y, Leff B, Neil J, Ritchie C. Homebound Patient and Caregiver Perceptions of Quality of Care in Home-Based Primary Care: A Qualitative Study. *Journal of the American Geriatrics Society*. 2016;64(8):1622-1627.
10. Smith-Carrier T, Sinha SK, Nowaczynski M, Akhtar S, Seddon G, Pham TT. It 'makes you feel more like a person than a patient': patients' experiences receiving home-based primary care (HBPC) in Ontario, Canada. *Health Soc Care Community*. 2017;25(2):723-733.
11. Edes T, Kinosian B, Vuckovic NH, Nichols LO, Becker MM, Hossain M. Better access, quality, and cost for clinically complex veterans with home-based primary care. *J Am Geriatr Soc*. 2014;62(10):1954-1961.
12. Ploeg J, Feightner J, Hutchison B, Patterson C, Sigouin C, Gauld M. Effectiveness of preventive primary care outreach interventions aimed at older people: meta-analysis of randomized controlled trials. *Canadian family physician Medecin de famille canadien*. 2005;51(9):1244-1245.
13. Gomes B, Calanzani N, Gysels M, Hall S, Higginson IJ. Heterogeneity and changes in preferences for dying at home: a systematic review. *BMC Palliative Care*. 2013;12(1):7.
14. Brown CRL, Webber C, Seow HY, et al. Impact of physician-based palliative care delivery models on health care utilization outcomes: A population-based retrospective cohort study. *Palliative medicine*. 2021:2692163211009440.
15. Tanuseputro P, Beach S, Chalifoux M, et al. Associations between physician home visits for the dying and place of death: A population-based retrospective cohort study. *PLoS one*. 2018;13(2):e0191322.
16. Schuchman M, Fain M, Cornwell T. The Resurgence of Home-Based Primary Care Models in the United States. *Geriatrics (Basel, Switzerland)*. 2018;3(3).
17. Landers SH, Gunn PW, Flocke SA, et al. Trends in House Calls to Medicare Beneficiaries. *JAMA*. 2005;294(19):2431-2436.
18. Sairenji T, Jetty A, Peterson LE. Shifting Patterns of Physician Home Visits. *Journal of primary care & community health*. 2015;7(2):71-75.
19. Health Quality Ontario. Primary Care Performance in Ontario. 2020; <https://www.hqontario.ca/System-Performance/Primary-Care-Performance>. Accessed June 14th, 2021.
20. Kiran T, Kopp A, Glazier RH. Those Left Behind From Voluntary Medical Home Reforms in Ontario, Canada. *The Annals of Family Medicine*. 2016;14(6):517.
21. Ontario Medical Association, Ministry of Health and Long Term Care. *Memorandum of Agreement: The Ontario Medical Association and Her Majesty the Queen in Right of Ontario*. 2004.
22. Ontario Ministry of Health and Long-Term Care. Home Visits Special Premium Payment and Reporting (CCM,FHG, FHN, FHO). *INFOBulletin*. 2013;11089.
23. Statistics Canada. Population estimates, quarterly. 2021; <https://www150.statcan.gc.ca/t1/tbl1/en/tv.action?pid=1710000901>. Accessed June 3rd, 2021.

- 1
- 2
- 3
- 4 24. Kralj B. Measuring Rurality - RIO2008\_BASIC: Methodology and Results 2009;  
5 <https://content.oma.org/wp-content/uploads/2008rio-fulltechnicalpaper.pdf>. Accessed  
6 December 11th, 2020.
- 7 25. Rezai MR, Maclagan LC, Donovan LR, Tu JV. Classification of Canadian immigrants into visible  
8 minority groups using country of birth and mother tongue. *Open medicine : a peer-reviewed,  
9 independent, open-access journal*. 2013;7(4):e85-93.
- 10 26. Johns Hopkins University. Johns Hopkins ACG Case-Mix Adjustment System.  
11 <https://www.hopkinsacg.org/>. Accessed April 11th, 2019.
- 12 27. Chiu M, Gatov E, Fung K, Kurdyak P, Guttman A. Deconstructing The Rise In Mental Health-  
13 Related ED Visits Among Children And Youth In Ontario, Canada. *Health Affairs*.  
14 2020;39(10):1728-1736.
- 15 28. Jaakkimainen RL, Bronskill SE, Tierney MC, et al. Identification of Physician-Diagnosed  
16 Alzheimer's Disease and Related Dementias in Population-Based Administrative Data: A  
17 Validation Study Using Family Physicians' Electronic Medical Records. *Journal of Alzheimer's  
18 disease : JAD*. 2016;54(1):337-349.
- 19 29. Gershon AS, Wang C, Guan J, Vasilevska-Ristovska J, Cicutto L, To T. Identifying patients with  
20 physician-diagnosed asthma in health administrative databases. *Canadian respiratory journal :  
21 journal of the Canadian Thoracic Society*. 2009;16(6):183-188.
- 22 30. To T, Dell S, Dick P, et al. Defining asthma in children for surveillance. *Am J Respir Crit Care Med*.  
23 2004;169:A383.
- 24 31. Lipscombe LL, Hwee J, Webster L, Shah BR, Booth GL, Tu K. Identifying diabetes cases from  
25 administrative data: a population-based validation study. *BMC health services research*.  
26 2018;18(1):316.
- 27 32. Gershon AS, Wang C, Guan J, Vasilevska-Ristovska J, Cicutto L, To T. Identifying individuals with  
28 physician diagnosed COPD in health administrative databases. *Copd*. 2009;6(5):388-394.
- 29 33. Schultz SE, Rothwell DM, Chen Z, Tu K. Identifying cases of congestive heart failure from  
30 administrative data: a validation study using primary care patient records. *Chronic diseases and  
31 injuries in Canada*. 2013;33(3):160-166.
- 32 34. Fitzpatrick T, Wilton AS, Guttman A. Development and validation of a simple algorithm to  
33 estimate common gestational age categories using standard administrative birth record data in  
34 Ontario, Canada. *Journal of obstetrics and gynaecology : the journal of the Institute of Obstetrics  
35 and Gynaecology*. 2021;41(2):207-211.
- 36 35. Poss JW, Jutan NM, Hirdes JP, et al. A review of evidence on the reliability and validity of  
37 Minimum Data Set data. *Healthc Manage Forum*. 2008;21(1):33-39.
- 38 36. Landi F, Tua E, Onder G, et al. Minimum data set for home care: a valid instrument to assess frail  
39 older people living in the community. *Med Care*. 2000;38(12):1184-1190.
- 40 37. Hirdes JP, Ljunggren G, Morris JN, et al. Reliability of the interRAI suite of assessment  
41 instruments: a 12-country study of an integrated health information system. *BMC health  
42 services research*. 2008;8:277.
- 43 38. Health Quality Ontario. Home Care Indicator Review: Summary Report 2017;  
44 [https://hqontario.ca/Portals/0/documents/system-performance/home-care-indicator-review-  
45 report-2017.pdf](https://hqontario.ca/Portals/0/documents/system-performance/home-care-indicator-review-report-2017.pdf). Accessed December 14th, 2020.
- 46 39. Home and Community Care Branch MoHaL-TC. *Home and Community Care in Ontario:  
47 Presentation to the Premier's Council on Improving Healthcare & Ending Hallway Medicine*.  
48 Toronto, Ontario 2018.
- 49 40. Poss J. Mind the gap? looking at reassessment patterns among Ontario longstay home care  
50 clients. . Canadian InterRAI Conference; 2009; Halifax, N.S., Canada.
- 51 41. Canadian Institute for Health Information. *Children and Youth With Medical Complexity in  
52 Canada*. Ottawa, ON 2020.
- 53 42. Hutchison B, Østbye T, Barnsley J, et al. Patient satisfaction and quality of care in walk-in clinics,  
54 family practices and emergency departments: the Ontario Walk-In Clinic Study. *CMAJ : Canadian  
55 Medical Association journal = journal de l'Association medicale canadienne*. 2003;168(8):977-  
56 983.
- 57 43. Fortin Ensign S, Baca-Motes K, Steinhubl SR, Topol EJ. Characteristics of the modern-day  
58 physician house call. *Medicine*. 2019;98(8):e14671.
- 59 44. Institute of Medicine Committee on Quality of Health Care in America. *Crossing the Quality  
60 Chasm: A New Health System for the 21st Century*. Washington (DC): National Academies Press  
(US); 2001.
45. Hedden L, Lavergne MR, McGrail KM, et al. Trends in Providing Out-of-Office, Urgent After-  
Hours, and On-Call Care in British Columbia. *The Annals of Family Medicine*. 2019;17(2):116.
46. Mueller Y, David S, Cohidon C, Locatelli I, Senn N. Home visits made by general practitioners in  
the canton of Vaud between 2006 and 2015. *Swiss Med Wkly*. 2019;149:w20037.



- 1
- 2
- 3
- 4 47. Osborn R, Moulds D, Schneider EC, Doty MM, Squires D, Sarnak DO. Primary Care Physicians In
- 5 Ten Countries Report Challenges Caring For Patients With Complex Health Needs. *Health Affairs*.
- 6 2015;34(12):2104-2112.
- 7 48. Ontario Ministry of Health. Kaplan Board of Arbitration Award - Appropriateness Working Group
- 8 (AWG): Changes to the Schedule of Benefits for Physician Services (Schedule) effective October
- 9 1st, 2019. *INFOBulletin*. 2019;4726.
- 10 49. Glazier RH, Green ME, Wu FC, Frymire E, Kopp A, Kiran T. Shifts in office and virtual primary care
- 11 during the early COVID-19 pandemic in Ontario, Canada. *Canadian Medical Association Journal*.
- 12 2021;193(6):E200.
- 13
- 14
- 15
- 16
- 17
- 18
- 19
- 20
- 21
- 22
- 23
- 24
- 25
- 26
- 27
- 28
- 29
- 30
- 31
- 32
- 33
- 34
- 35
- 36
- 37
- 38
- 39
- 40
- 41
- 42
- 43
- 44
- 45
- 46
- 47
- 48
- 49
- 50
- 51
- 52
- 53
- 54
- 55
- 56
- 57
- 58
- 59
- 60

Confidential

**Figure 1. Annual physician home visits per 10,000 people by type, in Ontario 2005-2018.**

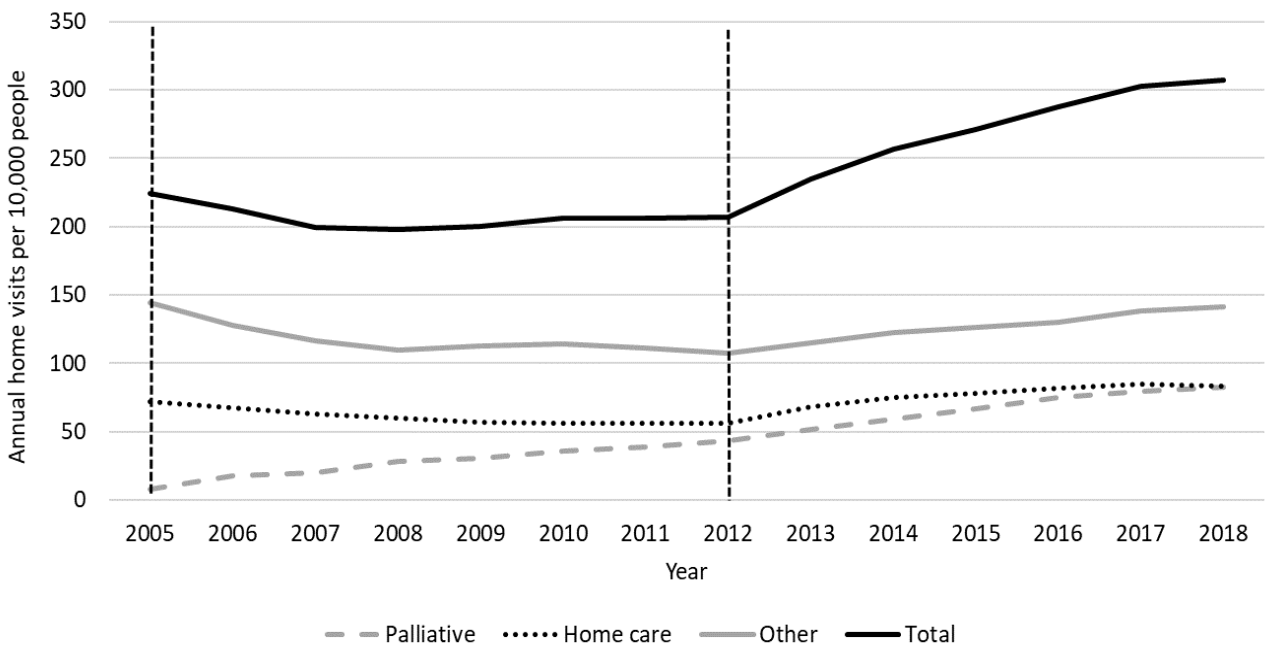

Lines at 2005 and 2012 mark the introductions of premium billing codes for palliative home visits, and higher volume incentives for primary care home visits, respectively.

**Figure 2. Annual total physician billings for home visits by type, in Ontario 2005-2018**

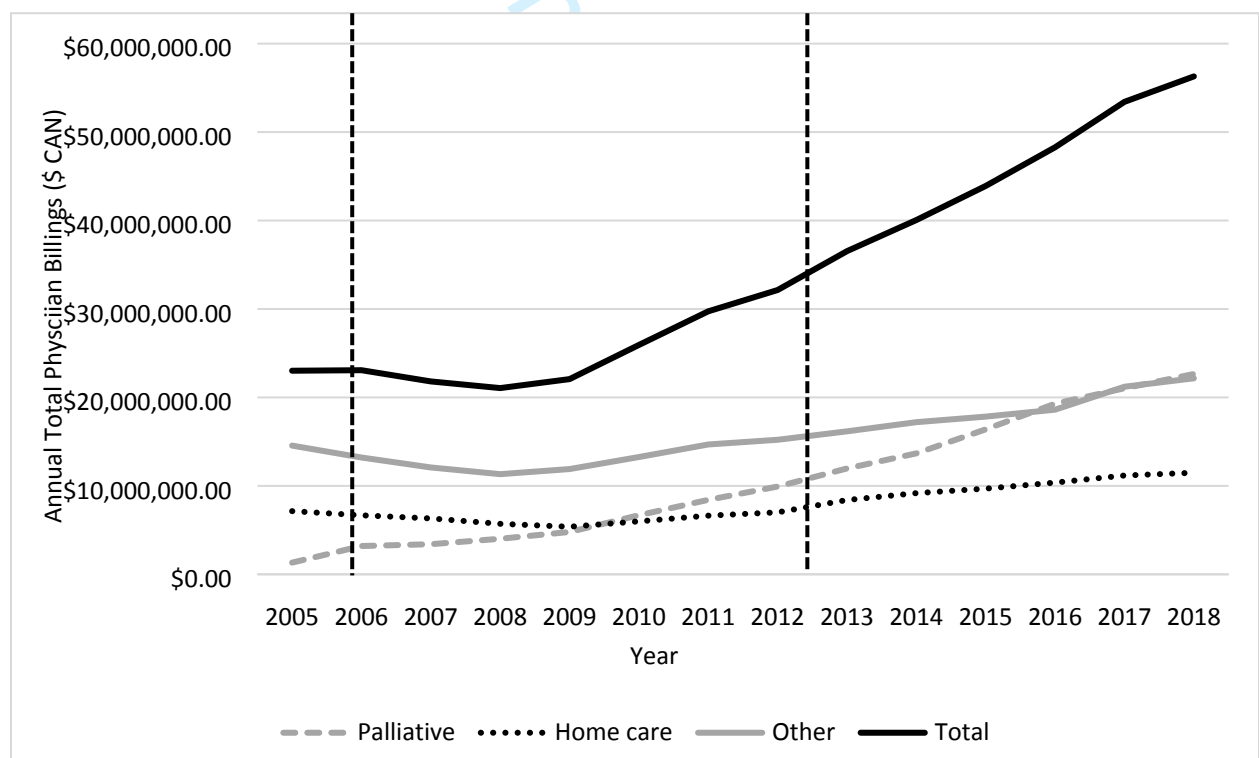

Lines at 2005 and 2012 mark the introductions of premium billing codes for palliative home visits, and higher volume incentives for primary care home visits, respectively.



**Table 1. Baseline, visiting physician and post-visit characteristics of patients receiving a physician home visit in Ontario, April 1<sup>st</sup> 2014 to March 1<sup>st</sup>, 2019.** P-values for comparison between home visits types: palliative, homecare services recipient and other.

| Characteristic                                      | Palliative<br>( N=70,947 ) | Homecare<br>service<br>recipient<br>(N=85,343) | Other (256,767) | Total<br>( N=413,057 ) | P-value |
|-----------------------------------------------------|----------------------------|------------------------------------------------|-----------------|------------------------|---------|
| <b>Baseline Characteristics</b>                     |                            |                                                |                 |                        |         |
| Age, n (%)                                          |                            |                                                |                 |                        |         |
| <18 years                                           | 597 (0.8)                  | 330 (0.4)                                      | 53,070 (20.7)   | 53,997 (13.1)          | <0.001  |
| 18 - 39 years                                       | 1,071 (1.5)                | 999 (1.2)                                      | 40,606 (15.8)   | 42,676 (10.3)          |         |
| 40 - 64 years                                       | 15,264 (21.5)              | 7,278 (8.5)                                    | 52,909 (20.6)   | 75,451 (18.3)          |         |
| 65 - 79 years                                       | 26,294 (37.1)              | 20,807 (24.4)                                  | 42,993 (16.7)   | 90,094 (21.8)          |         |
| 80+ years                                           | 27,721 (39.1)              | 55,929 (65.5)                                  | 67,189 (26.2)   | 150,841 (36.5)         |         |
| Sex female, n (%)                                   | 36,061 (50.8)              | 53,181 (62.3)                                  | 148,845 (58.0)  | 238,087 (57.6)         | <0.001  |
| Residence setting, n (%)                            |                            |                                                |                 |                        |         |
| Large urban                                         | 46,104 (65.0)              | 62,335 (73.0)                                  | 214,844 (83.7)  | 323,283 (78.3)         | <0.001  |
| Small urban                                         | 18,779 (26.5)              | 16,003 (18.8)                                  | 27,331 (10.6)   | 62,113 (15.0)          |         |
| Rural                                               | 5,428 (7.7)                | 6,363 (7.5)                                    | 11,913 (4.6)    | 23,704 (5.7)           |         |
| Missing                                             | 636 (0.9)                  | 642 (0.8)                                      | 2,679 (1.0)     | 3,957 (1.0)            |         |
| Comorbidity count, n (%)                            |                            |                                                |                 |                        |         |
| Low (0 - 5)                                         | 5,581 (7.9)                | 10,723 (12.6)                                  | 96,165 (37.5)   | 112,469 (27.2)         | <0.001  |
| Moderate (6 - 9)                                    | 21,535 (30.4)              | 25,253 (29.6)                                  | 93,750 (36.5)   | 140,538 (34.0)         |         |
| High (10+)                                          | 43,831 (61.8)              | 49,367 (57.8)                                  | 66,852 (26.0)   | 160,050 (38.7)         |         |
| Healthcare utilization band, n (%)                  |                            |                                                |                 |                        |         |
| Low (0 - 2)                                         | 405 (0.6)                  | 1,426 (1.7)                                    | 35,102 (13.7)   | 36,933 (8.9)           | <0.001  |
| Moderate (3)                                        | 7,554 (10.6)               | 14,854 (17.4)                                  | 114,442 (44.6)  | 136,850 (33.1)         |         |
| High (4 - 5)                                        | 62,988 (88.8)              | 69,063 (80.9)                                  | 107,223 (41.8)  | 239,274 (57.9)         |         |
| Neighborhood income quintiles, n (%)                |                            |                                                |                 |                        |         |
| 1                                                   | 15,043 (21.2)              | 21,423 (25.1)                                  | 62,125 (24.2)   | 98,591 (23.9)          | <0.001  |
| 2                                                   | 14,774 (20.8)              | 19,400 (22.7)                                  | 51,585 (20.1)   | 85,759 (20.8)          |         |
| 3                                                   | 14,113 (19.9)              | 16,552 (19.4)                                  | 45,364 (17.7)   | 76,029 (18.4)          |         |
| 4                                                   | 13,077 (18.4)              | 14,086 (16.5)                                  | 42,584 (16.6)   | 69,747 (16.9)          |         |
| 5                                                   | 13,756 (19.4)              | 13,537 (15.9)                                  | 53,527 (20.8)   | 80,820 (19.6)          |         |
| Missing                                             | 184 (0.3)                  | 345 (0.4)                                      | 1,582 (0.6)     | 2,111 (0.5)            |         |
| Recent emergency department visit, n (%)            | 30,868 (43.5)              | 23,707 (27.8)                                  | 29,860 (11.6)   | 84,435 (20.4)          | <0.001  |
| Recent hospital discharge, n (%)                    | 27,772 (39.1)              | 20,060 (23.5)                                  | 15,801 (6.2)    | 63,633 (15.4)          | <0.001  |
| Previous outpatient visits, median (IQR)            | 31 (17-51)                 | 16 (8-27)                                      | 8 (4-16)        | 12 (5-24)              | <0.001  |
| Homecare service visits in previous month, n (%)    |                            |                                                |                 |                        |         |
| 0                                                   | 12,129 (17.1)              | 0 (0.0)                                        | 249,336 (97.1)  | 261,465 (63.3)         | <0.001  |
| 1                                                   | 4,106 (5.8)                | 0 (0.0)                                        | 7,431 (2.9)     | 11,537 (2.8)           |         |
| 2+                                                  | 54,712 (77.1)              | 85,343 (100.0)                                 | 0 (0.0)         | 140,055 (33.9)         |         |
| Dementia, n (%)                                     | 9,856 (13.9)               | 31,132 (36.5)                                  | 27,891 (10.9)   | 68,879 (16.7)          | <0.001  |
| Mental health visits, n (%)                         | 2,620 (3.7)                | 5,714 (6.7)                                    | 10,814 (4.2)    | 19,148 (4.6)           | <0.001  |
| Chronic obstructive pulmonary disease (COPD), n (%) | 25,071 (35.3)              | 29,877 (35.0)                                  | 39,774 (15.5)   | 94,722 (22.9)          | <0.001  |
| Congestive heart failure, n (%)                     | 15,246 (21.5)              | 26,922 (31.5)                                  | 23,013 (9.0)    | 65,181 (15.8)          | <0.001  |
| Asthma, n (%)                                       | 11,029 (15.5)              | 16,203 (19.0)                                  | 48,016 (18.7)   | 75,248 (18.2)          | <0.001  |
| Post-partum or post-birth, n (%)                    | 97 (0.1)                   | 22 (0.0)                                       | 3,706 (1.4)     | 3,825 (0.9)            | <0.001  |
| Diabetes mellitus, n (%)                            | 22,667 (31.9)              | 33,475 (39.2)                                  | 47,807 (18.6)   | 103,949 (25.2)         | <0.001  |
| Limited proficiency in English/French, n (%)        | 2,298 (3.2)                | 2,949 (3.5)                                    | 11,441 (4.5)    | 16,688 (4.0)           | <0.001  |
| Immigrant status, n (%)                             | 4,998 (7.0)                | 6,126 (7.2)                                    | 29,975 (11.7)   | 41,099 (9.9)           | <0.001  |
| Primary care attachment, n (%)                      |                            |                                                |                 |                        |         |
| Formally enrolled                                   | 57,147 (80.5)              | 69,568 (81.5)                                  | 180,922 (70.5)  | 307,637 (74.5)         | <0.001  |
| Other primary care                                  | 11,891 (16.8)              | 14,443 (16.9)                                  | 66,165 (25.8)   | 92,499 (22.4)          |         |
| No primary care                                     | 1,909 (2.7)                | 1,332 (1.6)                                    | 9,680 (3.8)     | 12,921 (3.1)           |         |

| Visiting Physician Characteristics                                        |               |               |                |                |        |
|---------------------------------------------------------------------------|---------------|---------------|----------------|----------------|--------|
| Same as enrolled primary care physician, n (%)                            | 16,084 (22.7) | 38,532 (45.1) | 64,814 (25.2)  | 119,430 (28.9) | <0.001 |
| Another physician in same group as enrolled primary care physician, n (%) | 4,195 (5.9)   | 3,015 (3.5)   | 7,190 (2.8)    | 14,400 (3.5)   | <0.001 |
| Either same as enrolled primary care physician or same group, n (%)       | 20,279 (28.6) | 41,547 (48.7) | 72,004 (28.0)  | 133,830 (32.4) | <0.001 |
| Known to patient from a visit in the previous year, n (%)                 | 36,683 (51.7) | 52,372 (61.4) | 100,067 (39.0) | 189,122 (45.8) | <0.001 |
| Post-Visit Characteristics                                                |               |               |                |                |        |
| Repeat home visits in subsequent year, median (IQR)                       | 2 (0-5)       | 1 (0-3)       | 0 (0-1)        | 0 (0-2)        | <0.001 |
| Repeat home visits in subsequent year, n (%)                              |               |               |                |                |        |
| 0                                                                         | 18,668 (26.3) | 35,101 (41.1) | 155,987 (60.8) | 209,756 (50.8) | <0.001 |
| 1                                                                         | 12,707 (17.9) | 15,753 (18.5) | 43,503 (16.9)  | 71,963 (17.4)  |        |
| 2                                                                         | 8,671 (12.2)  | 9,116 (10.7)  | 19,356 (7.5)   | 37,143 (9.0)   |        |
| 3+                                                                        | 30,901 (43.6) | 25,373 (29.7) | 37,921 (14.8)  | 94,195 (22.8)  |        |
| Repeat home visits with same MD in subsequent year, n (%)                 |               |               |                |                |        |
| 0                                                                         | 24,987 (35.2) | 46,160 (54.1) | 184,652 (71.9) | 255,799 (61.9) | <0.001 |
| 1                                                                         | 13,515 (19.0) | 13,816 (16.2) | 31,751 (12.4)  | 59,082 (14.3)  |        |
| 2                                                                         | 8,265 (11.6)  | 7,035 (8.2)   | 12,741 (5.0)   | 28,041 (6.8)   |        |
| 3+                                                                        | 24,180 (34.1) | 18,332 (21.5) | 27,623 (10.8)  | 70,135 (17.0)  |        |
| Outpatient visit within 30 days, n (%)                                    | 32,127 (45.3) | 34,774 (40.7) | 109,366 (42.6) | 176,267 (42.7) | <0.001 |
| Emergency department visit within 30 days, n (%)                          | 14,422 (20.3) | 20,388 (23.9) | 33,491 (13.0)  | 68,301 (16.5)  | <0.001 |
| Urgent hospitalization within 30 days, n (%)                              | 10,404 (14.7) | 11,763 (13.8) | 11,511 (4.5)   | 33,678 (8.2)   | <0.001 |

**Table 2. Clinical Characteristics within Subgroup with a Recent Homecare Assessment**

|                                       | Palliative<br>( N=19,137 ) | Homecare<br>service<br>recipients<br>( N=52,273 ) | Other<br>( N=10,965 ) | Total<br>( N=82,375 ) | P-value |
|---------------------------------------|----------------------------|---------------------------------------------------|-----------------------|-----------------------|---------|
| Hearing impaired, n (%)               | 3,491 (18.2)               | 11,656 (22.3)                                     | 2,013 (18.4)          | 17,160 (20.8)         | <0.001  |
| Vision impaired, n (%)                | 2,014 (10.5)               | 7,083 (13.6)                                      | 1,006 (9.2)           | 10,103 (12.3)         | <0.001  |
| Caregiver in home, n (%)              | 12,987 (67.9)              | 27,362 (52.3)                                     | 4,575 (41.7)          | 44,924 (54.5)         | <0.001  |
| Assistive device, n (%)               | 14,890 (77.8)              | 46,922 (89.8)                                     | 8,024 (73.2)          | 69,836 (84.8)         | <0.001  |
| Locomotion dependent on others, n (%) | 10,594 (55.4)              | 31,278 (59.8)                                     | 4,155 (37.9)          | 46,027 (55.9)         | <0.001  |
| Homebound status, n (%)               |                            |                                                   |                       |                       |         |
| Homebound                             | 6,635 (37.1)               | 21,491 (43.0)                                     | 3,259 (31.5)          | 31,385 (40.1)         | <0.001  |
| Borderline homebound                  | 5,927 (33.1)               | 17,043 (34.1)                                     | 3,238 (31.3)          | 26,208 (33.5)         |         |

**Table 3. Baseline, visiting physician and post-visit characteristics of patients under age 18 receiving a physician home visit in Ontario, April 1<sup>st</sup> 2014 to March 1<sup>st</sup> 2019.\* P-values for comparison between home visits types: palliative, homecare services recipient and other.**

| Characteristic                                                    | Palliative<br>(N=597) | Homecare<br>recipient<br>(N=330) | Other<br>(N=53,070) | Total<br>(N=53,997) | P-value |
|-------------------------------------------------------------------|-----------------------|----------------------------------|---------------------|---------------------|---------|
| <b>Baseline Characteristics</b>                                   |                       |                                  |                     |                     |         |
| Age, median (IQR)                                                 | 6.44 ± 5.69           | 7.85 ± 6.08                      | 5.48 ± 5.06         | 5.50 ± 5.08         | <0.001  |
| Age group                                                         |                       |                                  |                     |                     | <0.001  |
| 0 – 1                                                             | 183 (30.7)            | 88 (26.7)                        | 15,697 (29.6)       | 15,968 (29.6)       |         |
| 2 – 5                                                             | 116 (19.4)            | 55 (16.7)                        | 16,261 (30.6)       | 16,432 (30.4)       |         |
| 6 - 12                                                            | 172 (28.8)            | 83 (25.2)                        | 13,907 (26.2)       | 14,162 (26.2)       |         |
| 13+                                                               | 126 (21.1)            | 104 (31.5)                       | 7,205 (13.6)        | 7,435 (13.8)        |         |
| Sex female, n (%)                                                 | 268 (44.9)            | 136 (41.2)                       | 25,265 (47.6)       | 25,669 (47.5)       | 0.029   |
| Residence setting, n (%)                                          |                       |                                  |                     |                     | <0.001  |
| Large urban                                                       | 390 (65.3)            | 275 (83.3)                       | 50,215 (94.6)       | 50,880 (94.2)       |         |
| Small urban                                                       | 145 (24.3)            | 32 (9.7)                         | 2,055 (3.9)         | 2,232 (4.1)         |         |
| Rural                                                             | 45 (7.5)              | 14 (4.2)                         | 525 (1.0)           | 584 (1.1)           |         |
| Missing                                                           | 17 (2.8)              | 9 (2.7)                          | 275 (0.5)           | 301 (0.6)           |         |
| Any complex chronic medical condition, n (%)                      | 455 (76.2)            | 231 (70.0)                       | 2,050 (3.9)         | 2,736 (5.1)         | <0.001  |
| Neighborhood income quintiles, n (%) <sup>‡</sup>                 |                       |                                  |                     |                     | <0.001  |
| 1                                                                 | 108 (18.1)            | 82 (24.8)                        | 12,568 (23.7)       | 12,758 (23.6)       |         |
| 2                                                                 | 104 (17.4)            | 67 (20.3)                        | 9,190 (17.3)        | 9,361 (17.3)        |         |
| 3                                                                 | 119 (19.9)            | 62 (18.8)                        | 8,948 (16.9)        | 9,129 (16.9)        |         |
| 4                                                                 | 136 (22.8)            | 60 (18.2)                        | 9,381 (17.7)        | 9,577 (17.7)        |         |
| 5                                                                 | 123 (20.6)            | 54 (16.4)                        | 12,788 (24.1)       | 12,965 (24.0)       |         |
| Recent emergency department visit, n (%)                          | 121 (20.3)            | 52 (15.8)                        | 2,890 (5.4)         | 3,063 (5.7)         | <0.001  |
| Recent hospital discharge, n (%)                                  | 213 (35.7)            | 55 (16.7)                        | 1,380 (2.6)         | 1,648 (3.1)         | <0.001  |
| Previous outpatient visits, median (IQR)                          | 31 (12-64)            | 14 (8-28)                        | 5 (3-9)             | 5 (3-10)            | <0.001  |
| Homecare service visits in previous month, n (%)                  |                       |                                  |                     |                     | <0.001  |
| 0                                                                 | 284 (47.6)            | 0 (0.0)                          | 52,963 (99.8)       | 53,247 (98.6)       |         |
| 1                                                                 | 54 (9.0)              | 0 (0.0)                          | 107 (0.2)           | 161 (0.3)           |         |
| 2+                                                                | 259 (43.4)            | 330 (100.0)                      | 0 (0.0)             | 589 (1.1)           |         |
| Post-partum or post birth, n (%)                                  | 85 (14.2)             | **                               | 2,243 (4.2)         | 2,328 (4.3)         | <0.001  |
| Mental health visits, n (%)                                       | 13 (1.4)**            |                                  | 591 (1.1)           | 604 (1.1)           | 0.65    |
| Asthma, n (%)                                                     | 133 (22.3)            | 98 (29.7)                        | 9,383 (17.7)        | 9,614 (17.8)        | <0.001  |
| Limited proficiency in English/French, n (%)                      | 11 (1.2)**            |                                  | 918 (1.7)           | 929 (1.7)           | 0.037   |
| Immigrant status, n (%)                                           | 11 (1.8)              | 11 (3.3)                         | 1,307 (2.5)         | 1,329 (2.5)         | 0.368   |
| Primary care attachment, n (%)                                    |                       |                                  |                     |                     | <0.001  |
| Formally enrolled                                                 | 259 (43.4)            | 125 (37.9)                       | 23,051 (43.4)       | 23,435 (43.4)       |         |
| Other primary care                                                | 195 (32.7)            | 159 (48.2)                       | 25,176 (47.4)       | 25,530 (47.3)       |         |
| No primary care                                                   | 143 (24.0)            | 46 (13.9)                        | 4,843 (9.1)         | 5,032 (9.3)         |         |
| <b>Visiting Physician Characteristics</b>                         |                       |                                  |                     |                     |         |
| Same as enrolling primary care physician, n (%)                   | 39 (6.5)              | 42 (12.7)                        | 3,181 (6.0)         | 3,262 (6.0)         | <0.001  |
| Either same enrolling primary care physician or same group, n (%) | 60 (10.1)             | 46 (13.9)                        | 3,927 (7.4)         | 4,033 (7.5)         |         |
| Known to patient from a visit in the previous year, n (%)         | 298 (49.9)            | 104 (31.5)                       | 7,949 (15.0)        | 8,351 (15.5)        | <0.001  |

| Post-Visit Characteristics                                |            |            |               |               |        |
|-----------------------------------------------------------|------------|------------|---------------|---------------|--------|
| Repeat home visits in subsequent year, median (IQR)       | 2 (0-7)    | 0 (0-2)    | 0 (0-1)       | 0 (0-1)       | <0.001 |
| Repeat home visits in subsequent year, n (%)              |            |            |               |               | <0.001 |
| 0                                                         | 197 (33.0) | 180 (54.5) | 33,946 (64.0) | 34,323 (63.6) |        |
| 1                                                         | 75 (12.6)  | 62 (18.8)  | 10,103 (19.0) | 10,240 (19.0) |        |
| 2                                                         | 56 (9.4)   | 34 (10.3)  | 4,168 (7.9)   | 4,258 (7.9)   |        |
| 3+                                                        | 269 (45.1) | 54 (16.4)  | 4,853 (9.1)   | 5,176 (9.6)   |        |
| Repeat home visits with same MD in subsequent year, n (%) |            |            |               |               | <0.001 |
| 0                                                         | 270 (45.2) | 245 (74.2) | 44,294 (83.5) | 44,809 (83.0) |        |
| 1                                                         | 91 (15.2)  | 46 (13.9)  | 5,716 (10.8)  | 5,853 (10.8)  |        |
| 2                                                         | 64 (10.7)  | 14 (4.2)   | 1,577 (3.0)   | 1,655 (3.1)   |        |
| 3+                                                        | 172 (28.8) | 25 (7.6)   | 1,483 (2.8)   | 1,680 (3.1)   |        |
| Outpatient visit within 30 days, n (%)                    | 339 (56.8) | 159 (48.2) | 19,941 (37.6) | 20,439 (37.9) | <0.001 |
| Emergency department visit within 30 days, n (%)          | 99 (16.6)  | 57 (17.3)  | 4,815 (9.1)   | 4,971 (9.2)   | <0.001 |
| Urgent hospitalization within 30 days, n (%)              | 61 (10.2)  | 33 (10.0)  | 494 (0.9)     | 588 (1.1)     | <0.001 |

\* Dementia, COPD, CHF and post-partum status were not reported in this group.

\*\* cells suppressed to prevent re-identification of groups <6 individuals

☐ N=207 with missing values

Confidential

## APPENDIX

Appendix Table 1- ICES data sources

| Database name                                                                         | Description                                                                                                                                                                                                                                                                                                                                                                                                  |
|---------------------------------------------------------------------------------------|--------------------------------------------------------------------------------------------------------------------------------------------------------------------------------------------------------------------------------------------------------------------------------------------------------------------------------------------------------------------------------------------------------------|
| <b>Registered Persons Database (RPDB)</b>                                             | Contains demographic information about anyone who has ever received an Ontario health card number, i.e. all Ontarians alive at any time since 1990 (over 16 million records).(1)                                                                                                                                                                                                                             |
| <b>Ontario Health Insurance Plan (OHIP)</b>                                           | Contains information on all billing claims submitted by Ontario physicians (consultations and procedures). Fee for service is the primary method of remuneration for 95% of specialist physicians and 50% of primary care physicians in Ontario. However, physicians practicing in non fee-for-service models submit shadow billings to OHIP, which appear as billing claims with a payment value of \$0.(2) |
| <b>National Ambulatory Care Reporting System (NACRS)</b>                              | Includes information for all emergency department visits since 2000. A re-abstraction study of diagnostic codes found 85% agreement for the main presenting problem.(3)                                                                                                                                                                                                                                      |
| <b>Discharge Abstract Database (DAD)</b>                                              | Information on all admissions (excluding designated mental health beds) to acute care hospitals in Ontario. This includes dates of admission as well as diagnostic and procedural codes. Overall, diagnostic codes were found to be 82% sensitive for primary diagnosis when verified against chart abstraction.(4)                                                                                          |
| <b>Ontario Mental Health Reporting System (OMHRS)</b>                                 | Includes information on all admissions to designated adult inpatient mental health beds in Ontario.(5)                                                                                                                                                                                                                                                                                                       |
| <b>Home Care Database (HCD)</b>                                                       | Includes all publicly funded home care services, including the service type (end-of-life or not).(6)                                                                                                                                                                                                                                                                                                         |
| <b>Client Agency Program Enrolment Database (CAPE)</b>                                | Links physicians to their enrolled patients under several patient enrolment models of clinical practice. These funding models include enhanced fee for service, non-team capitation, and team-based capitation.(7)                                                                                                                                                                                           |
| <b>Immigration Refugees and Citizenship Canada Permanent Resident Database (IRCC)</b> | Contains information on immigrants who have landed in Ontario since 1985.(8)                                                                                                                                                                                                                                                                                                                                 |
| <b>Ontario Diabetes Dataset (ODD)</b>                                                 | Contains individuals in Ontario with any type of non-gestational diabetes identified since 1991. Combines data from OHIP, RPDB, ODB and DAD. When validated against clinical charts, this was 90% sensitive and 98% specific for a diagnosis of adult diabetes.(9)                                                                                                                                           |
| <b>Ontario Congestive Heart Failure (CHF) dataset</b>                                 | Contains all Ontario individuals with CHF identified since 1991. This dataset combines data from DAD, OMHRS, OHIP and NACRS. Among adults over age 40, sensitivity was 85% and specificity was 97% when validated against chart review.(10)                                                                                                                                                                  |
| <b>Ontario Chronic Obstructive Pulmonary Disease Cohort (COPD)</b>                    | Contains all Ontario COPD patients identified since 1991. This dataset combines data from DAD and OHIP. Among adults over age 35, sensitivity was 85% and specificity was 78% when validated against chart review.(11)                                                                                                                                                                                       |

|                                            |                                                                                                                                                                                                                                                                                                                                                                             |
|--------------------------------------------|-----------------------------------------------------------------------------------------------------------------------------------------------------------------------------------------------------------------------------------------------------------------------------------------------------------------------------------------------------------------------------|
| <b>Ontario Dementia dataset (DEMENTIA)</b> | Includes all Ontario persons who were identified with Alzheimer's and related dementias in ICES data holdings between the ages of 40 to 110 years. This dataset combines data from DAD, OHIP and prescribed medications from the Ontario Drug Benefit (ODB). Among adults over age 65, sensitivity was 79% and specificity was 99% when validated against chart review.(12) |
| <b>Ontario Asthma Cohort (ASTHMA)</b>      | Contains all Ontario asthma patients identified since 1991. Combines information from DAD and OHIP. In adults, 80% sensitive, 81% specific against chart review.(13) Among those under age 18, 89% sensitive, 72% specific against chart review. (14)                                                                                                                       |
| <b>MOMBABY dataset</b>                     | MOMBABY dataset links the DAD inpatient admission records of delivering mothers and their newborns.(15)                                                                                                                                                                                                                                                                     |

Confidential

**Appendix Table 2- Codes Used to Identify Palliative Care and Not Palliative Home Visits. Home visits were first classified as palliative if any palliative codes were present.**

| Type of Home Visit                                                                   | Code                      | Descriptor of code                                                       |
|--------------------------------------------------------------------------------------|---------------------------|--------------------------------------------------------------------------|
| <b>Palliative care</b>                                                               | B998                      | Palliative Home Visit-<br>Special visit premium daytime/evenings/weekend |
|                                                                                      | B997                      | Palliative Home Visit-<br>Special visit premium nights                   |
|                                                                                      | B966                      | Palliative Home Visit-<br>Travel premium                                 |
|                                                                                      | A945                      | GEN./FAM.PRACT.SPECIAL PALLIATIVE CARE<br>CONSULTATION                   |
|                                                                                      | A905                      | GENERAL/FAMILY PRACTICE-LIMITED CONSULTATION                             |
|                                                                                      | G512                      | Palliative care case management fee                                      |
|                                                                                      | K700                      | PALLIATIVE CARE OUT-PATIENT CASE CONFERENCE                              |
| <b>Not palliative</b><br>(used for home<br>care services group<br>and "other" group) | A901                      | House call assessment (in FP/GP section)                                 |
|                                                                                      | A900                      | Complex house call assessment- for "frail elderly or<br>housebound"      |
|                                                                                      | A902                      | House call-to pronounce death                                            |
|                                                                                      | B960, B990,<br>B961, B992 | Home visit Special visit premiums daytime                                |
|                                                                                      | B962, B994,<br>B964, B996 | Home visit Special visit premiums evenings and nights                    |
|                                                                                      | B963, B993                | Home visit Special visit premiums Weekends and holidays                  |



**Appendix Table 3- Operational Definitions for all Variables**

| Variable                                                      | Data Source      | Definition                                                                                                                                                                                                                                                               |
|---------------------------------------------------------------|------------------|--------------------------------------------------------------------------------------------------------------------------------------------------------------------------------------------------------------------------------------------------------------------------|
| Age                                                           | RPDB             | Categorized as<br><18 years (children)<br>18-39 years (young adult)<br>40-64 years (middle aged)<br>65-79 years (younger seniors)<br>80+ years (older seniors)                                                                                                           |
| Sex                                                           | RPDB             | Male<br>Female                                                                                                                                                                                                                                                           |
| Residence setting                                             | RPDB             | Postal code converted to RIO score(16)<br>0-9 : large urban<br>10-39: small urban<br>40+: rural                                                                                                                                                                          |
| Neighborhood income quintile                                  | RPDB, Census     | Nearest census-based income quintile based on postal code (based on 2016 census).(17)                                                                                                                                                                                    |
| Comorbidity count                                             | DAD, NACRS, OHIP | Count of ACG System Aggregated Diagnosis Groups (ADGs, per the Johns Hopkins ACG® System Version 7, in 2 years prior to the index date.(18) Categorized as:<br>Low 0-5<br>Moderate 6-9<br>High 10+                                                                       |
| Healthcare Utilization                                        | DAD, NACRS, OHIP | Using Resource Utilization Bands (RUBs), per the Johns Hopkins ACG® System Version 7, in 2 years prior to the index date.(18) Categorized as:<br>Low (0-2)<br>Moderate (3)<br>High (4-5)                                                                                 |
| Pediatric Chronic Medical Condition (Pediatric subgroup only) | DAD              | For pediatric (under age 18 group), diagnostic code of a chronic medical condition or any procedure either inpatient or outpatient, per the definition use by the Canadian Institute for Health Information.(19)                                                         |
| Recent emergency department visit                             | DAD              | At least one emergency department in the previous 30 days.                                                                                                                                                                                                               |
| Recent hospital discharge                                     | DAD              | Discharged from an acute care facility within the previous 30-day period.                                                                                                                                                                                                |
| Previous outpatient physician visits                          | OHIP             | Count of all visits in previous year that occurred in an office setting (location="O"). Exclude codes that start with: X, J, L, E, Q0**, Q1**, Q2**. Combine all codes by same physician, on same day, with same patient into 1, to avoid double counting office visits. |
| Homecare service visits in previous month                     | HCD              | Number of home care visits in the 30 days before the home visit (restrict to only visits with CARESITE=21 (household).                                                                                                                                                   |



|                                                                   |                      |                                                                                                                                                                                                                                                                                                                 |
|-------------------------------------------------------------------|----------------------|-----------------------------------------------------------------------------------------------------------------------------------------------------------------------------------------------------------------------------------------------------------------------------------------------------------------|
| Dementia                                                          |                      | Code as 1 if either of:<br>- presence in "DEMENTIA" dataset at ICES.<br>- RAI-HC component (J1G or J1H)=yes in 5-year look-back from index date.                                                                                                                                                                |
| Mental health visits                                              | OHIP/NACRS/DAD/OMHRS | Coded as 1 if any admission, emergency department visits, or outpatient visit for a mental health-related condition in previous 2 years. The detailed algorithm and codes used have been described elsewhere:<br>- ED/admissions using NACRS, DAD and OMHRS data(20)<br>- outpatient visits using OHIP data(21) |
| Chronic obstructive pulmonary disease (COPD)                      | COPD                 | Presence in COPD database                                                                                                                                                                                                                                                                                       |
| Congestive heart failure (CHF)                                    | CHF                  | Presence in CHF database                                                                                                                                                                                                                                                                                        |
| Asthma                                                            | ASTHMA               | Presence in ASTHMA database                                                                                                                                                                                                                                                                                     |
| Post-partum                                                       | MOMBABY              | Presence in "MOM-BABY" dataset with baby date of birth up to 90 days before index home visit date. (B_BDATE-index date ≤ 90 days)<br>If yes then code as 1. Otherwise code as 0.                                                                                                                                |
| Diabetes                                                          | ODD                  | Presence in ODD                                                                                                                                                                                                                                                                                                 |
| Limited proficiency in English or French                          | IRCC                 | CAN_LANG=4 in IRCC database                                                                                                                                                                                                                                                                                     |
| Immigrant status                                                  | IRCC                 | Present in IRCC database(8)                                                                                                                                                                                                                                                                                     |
| Primary care attachment                                           | CAPE, OHIP           | %getpcprovider macro using the methods described by Stukel et al.(22)<br>- formally enrolled(ROSTERED=1)<br>- other primary care physician (ROSTERED=2)<br>- no primary care (ROSTERED=0)                                                                                                                       |
| Same as enrolled primary care provider                            | CAPE                 | %getpcprovider macro using the methods described by Stukel et al.(22)<br>Code as yes if the home visit MD is the same MD as enrolled MD ('ROSTERED'=1)                                                                                                                                                          |
| Another physician in same group as enrolled primary care provider | CAPE                 | Use macro %getpcprovider<br>If "ROSTERED"=1 then Compare patient's enrolling "groupnum" to groupnum(s) of home visit physician on index date.<br>If patient rostered=1 and physnums are different, but groupnums are the same, then code as 1.                                                                  |
| Either same as enrolled primary care provider or same group       | CAPE                 | Use macro %getpcprovider<br>If "ROSTERED"=1 then Compare patient's enrolling "groupnum" to groupnum(s) of home visit physician on index date.<br>If patient rostered=1 and groupnum is the same code as 1                                                                                                       |
| Known to patient from a visit in the previous year                | OHIP                 | Home visit MD had least 1 previous visit (in any setting) with this patient in the previous 365 days                                                                                                                                                                                                            |

|                                                                                           |        |                                                                                                                                                                                                                                                                                                                          |
|-------------------------------------------------------------------------------------------|--------|--------------------------------------------------------------------------------------------------------------------------------------------------------------------------------------------------------------------------------------------------------------------------------------------------------------------------|
| Repeat home visits in subsequent year                                                     | HCD    | Count of repeat home visits (combined multiple home visits in one day into one home visit) in subsequent 365 days after the first.                                                                                                                                                                                       |
| Repeat home visits with same MD in subsequent year                                        | OHIP   | Subsequent MD home visits with the same physician as the first home visit.                                                                                                                                                                                                                                               |
| Outpatient visit within 30 days                                                           | OHIP   | <b>Count</b> of outpatient physician visit in the <b>30 days</b> following the home visit- include the day of the home visit.<br><br>Code as outpatient visit if there is at least one visit that is assigned to location = "O" (office), excluding OHIP codes starting with: X, J, L, E, Q0**, Q1**, Q2**               |
| Emergency department visit within 30 days                                                 | NACRS  | Code as 1 if visit to the emergency department within 30 days of home visit. Start count on the day of the index home visit date                                                                                                                                                                                         |
| Urgent hospitalization within 30 days                                                     | DAD    | Code as 1 if urgent admission (ADM CAT="U") to an acute care hospital within 30 days of home visit. Start the count on the day of the index home visit date.                                                                                                                                                             |
| <b>Subgroup with RAI-HC completed within 6 months prior to index physician home visit</b> |        |                                                                                                                                                                                                                                                                                                                          |
| Hearing impaired                                                                          | RAI-HC | C1_RAIHC=(2 or 3) or D3=(2, 3, or 4)<br>Corresponds to "Hearing" is either "hears in special situations only" or "highly impaired"                                                                                                                                                                                       |
| Vision impaired                                                                           | RAI-HC | D1_RAIHC or D4=(2, 3, or 4)<br>Corresponds to "Vision" is "impaired" (sees large print only) or "moderately impaired" or "highly impaired" or "severely impaired"                                                                                                                                                        |
| Caregiver in home                                                                         | RAI-HC | Score as 1 if either (G1EA_RAIHC or G1EB_RAIHC)=0 (in form 0=yes)<br>Corresponds to "Informal helpers (primary and secondary)" and "lives with client" for each of "primary" and "secondary."                                                                                                                            |
| Assistive Device                                                                          | RAI-HC | Coded as 1 if (H4A or H4B) = (1,2,3,4)<br>Corresponds to "Primary modes of locomotion" any of: "cane", "walker/crutch", "scooter", or "wheelchair"                                                                                                                                                                       |
| Dependent on others for locomotion                                                        | RAI-HC | Not independent, if (G2f or H2C)=(1,2,3,4,5,6,8)<br>Corresponds to "Locomotion in home" within "ADL self-performance" anything other than "independent" (includes "setup help only", "supervision", limited assistance", "extensive assistance", "maximal assistance", "total dependence" and "activity did not occur"). |
| Homebound Status                                                                          | RAI-HC | Not homebound (0)= H6A ("Stamina-Days") is 0-1<br>Borderline homebound (1)= H6A ("Stamina-Days") is 2<br>Homebound (2)= H6A ("Stamina-Days") is 3 <b>or</b> G4b=0                                                                                                                                                        |

**Appendix Table 4: Top 10 Most Common Diagnoses Claimed for Home Visits to Patients in the “Other” group**

| Diagnosis code | Description                                                                                                                   | N (%)         |
|----------------|-------------------------------------------------------------------------------------------------------------------------------|---------------|
| 460            | Acute nasopharyngitis, common cold                                                                                            | 36,411 (14.2) |
| 466            | Acute bronchitis                                                                                                              | 11,841 (4.61) |
| 300            | Anxiety neurosis, hysteria, neurasthenia, obsessive compulsive neurosis, reactive depression                                  | 10,951 (4.26) |
| 290            | Senile dementia, presenile dementia                                                                                           | 10,404 (4.05) |
| 401            | Essential, benign hypertension                                                                                                | 7,449 (2.90)  |
| 787            | Anorexia, nausea and vomiting, heartburn, dysphagia, hiccough, hematemesis, jaundice, ascites, abdominal pain, melena, masses | 7,424 (2.89)  |
| 009            | Diarrhea, gastro-enteritis, viral gastro-enteritis                                                                            | 7,136 (2.78)  |
| 799            | Other ill-defined conditions                                                                                                  | 6,427 (2.50)  |
| 781            | Leg cramps, leg pain, muscle pain, joint pain, arthralgia, joint swelling, masses                                             | 6,382 (2.48)  |
| 079            | Other viral diseases                                                                                                          | 6,229 (2.42)  |

**Appendix Table 5: Top 10 Most Common Diagnoses Claimed for Home Visits to Patients Under Age 18 in the “Other” group**

| Diagnosis code | Description                                                                                                                   | N (%)         |
|----------------|-------------------------------------------------------------------------------------------------------------------------------|---------------|
| 460            | Acute nasopharyngitis, common cold                                                                                            | 17,333 (32.6) |
| 079            | Other viral diseases                                                                                                          | 3,186 (6.00)  |
| 381            | Serous otitis media, eustachian tube disorders                                                                                | 2,753 (5.19)  |
| 009            | Diarrhea, gastro-enteritis, viral gastro-enteritis                                                                            | 2,488 (4.69)  |
| 466            | Acute bronchitis                                                                                                              | 1,865 (3.51)  |
| 382            | Suppurative otitis media                                                                                                      | 1,651 (3.11)  |
| 691            | Eczema, atopic dermatitis, neurodermatitis                                                                                    | 1,623 (3.06)  |
| 034            | Streptococcal sore throat, scarlet fever                                                                                      | 1,605 (3.02)  |
| 787            | Anorexia, nausea and vomiting, heartburn, dysphagia, hiccough, hematemesis, jaundice, ascites, abdominal pain, melena, masses | 1,602 (3.02)  |
| 463            | Acute tonsillitis                                                                                                             | 1,233 (2.32)  |

1  
2  
3  
4  
5  
6  
7  
8  
9  
10  
11  
12  
13  
14  
15  
16  
17  
18  
19  
20  
21  
22  
23  
24  
25  
26  
27  
28  
29  
30  
31  
32  
33  
34  
35  
36  
37  
38  
39  
40  
41  
42  
43  
44  
45  
46  
47  
48  
49  
50  
51  
52  
53  
54  
55  
56  
57  
58  
59  
60

**Appendix Figure 1- Flowchart**

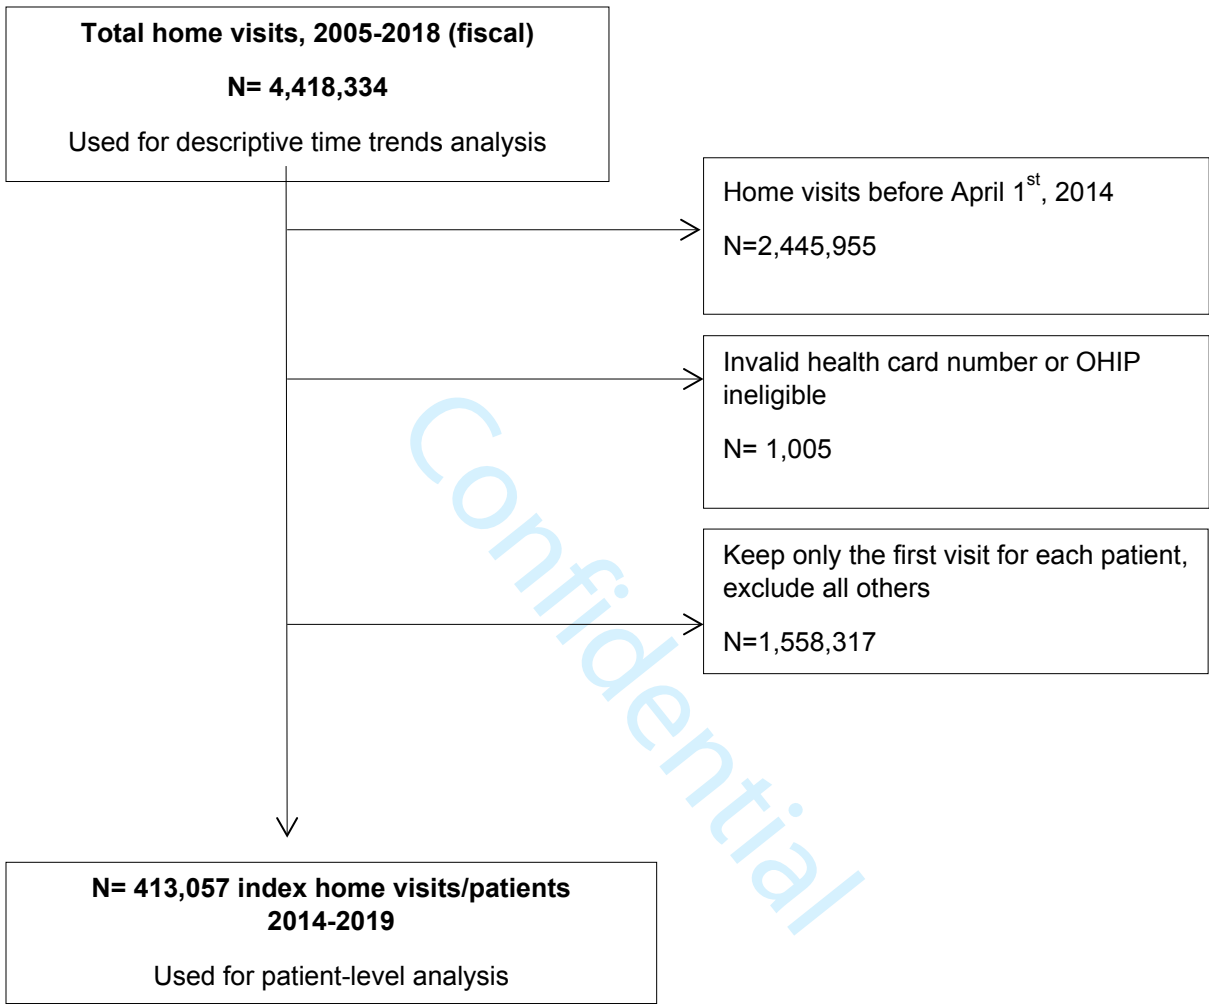

## References

1. Institute for Clinical Evaluative Sciences. Population and Demographic Data: RPDB. In; 2011.
2. ICES. Ontario Health Insurance Plan (OHIP). In. ICES Data Dictionary; 2017.
3. Canadian Institute for Health Information. CIHI Data Quality Study of Ontario Emergency Department Visits for Fiscal Year 2004–2005—Executive Summary. Ottawa; 2007.
4. Juurlink DN, Preyra C, Croxford R, Chong A, Austin PC, Tu JV, Laupacis A. Canadian Institute for Health Information Discharge Abstract Database: A Validation Study. Toronto, Ontario: Institute for Clinical Evaluative Sciences; 2006.
5. Canadian Institute for Health Information. Ontario Mental Health Reporting System Data Quality Documentation, 2019-2020. In. Ottawa, Ontario: CIHI; 2020.
6. Jones A, Schumacher C, Bronskill SE, Campitelli MA, Poss JW, Seow H, Costa AP. The association between home care visits and same-day emergency department use: a case-crossover study. *Cmaj* 2018;190:E525-e531.
7. Kiran T, Victor JC, Kopp A, Shah BR, Glazier RH. The relationship between financial incentives and quality of diabetes care in Ontario, Canada. *Diabetes Care* 2012;35:1038-1046.
8. Rezai M, Maclagan L, Donovan L, Tu JV. Classification of Canadian immigrants into visible minority groups using country of birth and mother tongue. *Open Medicine : A Peer-reviewed, Independent, Open-access Journal* 2013;7.
9. Lipscombe LL, Hwee J, Webster L, Shah BR, Booth GL, Tu K. Identifying diabetes cases from administrative data: a population-based validation study. *BMC Health Services Research* 2018;18:316.
10. Schultz SE, Rothwell DM, Chen Z, Tu K. Identifying cases of congestive heart failure from administrative data: a validation study using primary care patient records. *Chronic Dis Inj Can* 2013;33:160-166.
11. Gershon AS, Wang C, Guan J, Vasilevska-Ristovska J, Cicutto L, To T. Identifying individuals with physician diagnosed COPD in health administrative databases. *Copd* 2009;6:388-394.
12. Jaakkimainen RL, Bronskill SE, Tierney MC, Herrmann N, Green D, Young J, Ivers N, et al. Identification of Physician-Diagnosed Alzheimer's Disease and Related Dementias in Population-Based Administrative Data: A Validation Study Using Family Physicians' Electronic Medical Records. *J Alzheimers Dis* 2016;54:337-349.
13. Gershon AS, Wang C, Guan J, Vasilevska-Ristovska J, Cicutto L, To T. Identifying patients with physician-diagnosed asthma in health administrative databases. *Can Respir J* 2009;16:183-188.
14. To T, Dell S, Dick P, Cicutto L, MacLusky I, Tassoudji M, Harris JK. Defining asthma in children for surveillance. *Am J Respir Crit Care Med* 2004;169:A383.
15. Fitzpatrick T, Wilton AS, Guttman A. Development and validation of a simple algorithm to estimate common gestational age categories using standard administrative birth record data in Ontario, Canada. *J Obstet Gynaecol* 2021;41:207-211.
16. Kralj B. Measuring Rurality - RIO2008\_BASIC: Methodology and Results In: OMA Economics Department, editor.; 2009.
17. Alter DA, Naylor CD, Austin P, Tu JV. Effects of Socioeconomic Status on Access to Invasive Cardiac Procedures and on Mortality after Acute Myocardial Infarction. *New England Journal of Medicine* 1999;341:1359-1367.
18. Johns Hopkins University. Johns Hopkins ACG Case-Mix Adjustment System. In.
19. Canadian Institute for Health Information. Children and Youth With Medical Complexity in Canada. Ottawa, ON; 2020.

1  
2  
3  
4  
5  
6  
7  
8  
9  
10  
11  
12  
13  
14  
15  
16  
17  
18  
19  
20  
21  
22  
23  
24  
25  
26  
27  
28  
29  
30  
31  
32  
33  
34  
35  
36  
37  
38  
39  
40  
41  
42  
43  
44  
45  
46  
47  
48  
49  
50  
51  
52  
53  
54  
55  
56  
57  
58  
59  
60

20. Chiu M, Gatov E, Fung K, Kurdyak P, Guttman A. Deconstructing The Rise In Mental Health-Related ED Visits Among Children And Youth In Ontario, Canada. *Health Affairs* 2020;39:1728-1736.

21. Steele LS, Glazier RH, Lin E, Evans M. Using administrative data to measure ambulatory mental health service provision in primary care. *Med Care* 2004;42:960-965.

22. Stukel T, Glazier RH, Schultz SE, Guan J, Zagorski BM, Gozdyra P, Henry DA. Multispecialty physician networks in Ontario. *Open Medicine : A Peer-reviewed, Independent, Open-access Journal* 2013.

Confidential
